# Supplementary material for: PbV2O6 under compression: near zero-linear compressibility and pressure-induced change in vanadium coordination
Source: Royal Society of Chemistry journal article supplement (doi:10.1039/d4dt01321b), 2024-01-01
Supplement: d4dt01321b1.pdf [file d4dt01321b1.pdf]

## Supplementary Material

### **PbV<sub>2</sub>O<sub>6</sub> under compression: Near zero-linear compressibility and pressure-induced change in vanadium coordination**

Josu Sánchez Martín,<sup>\*a</sup> Julio Pellicer-Porres,<sup>a</sup> Robin Turnbull,<sup>a</sup> Daniel Díaz-Anichtchenko,<sup>a</sup> Simone Anzellini,<sup>a</sup> Akun Liang,<sup>a,b</sup> Catalin Popescu,<sup>c</sup> Marco Bettinelli,<sup>d</sup> Plácida Rodríguez-Hernández,<sup>e</sup> Alfonso Muñoz<sup>e</sup> and Daniel Errandonea<sup>a</sup>

- a. Departamento de Física Aplicada-ICMUV, Universidad de Valencia, Dr. Moliner 50, Burjassot, 46100 Valencia, Spain. \*E-mail: Josu.Sanchez@uv.es
- b. Centre for Science at Extreme Conditions and School of Physics and Astronomy, University of Edinburgh, EH9 3FD Edinburgh, United Kingdom
- c. CELLS-ALBA Synchrotron Light Facility, Cerdanyola del Vallès, 08290 Barcelona, Spain
- d. Laboratorio Materiali Luminescenti, Dipartimento di Biotecnologie, Università di Verona, and INSTM, UdR Verona, Strada Le Grazie 15, 37134 Verona, Italy
- e. Departamento de Física, MALTA-Consolider Team, Instituto de Materiales y Nanotecnología, Universidad de La Laguna, San Cristóbal de La Laguna, E-38200 Tenerife, Spain

Table S1. Raman modes, wavenumbers and pressure coefficients corresponding to the active Raman modes at ambient conditions for  $\text{PbV}_2\text{O}_6$ .  $\omega_0$  is expressed in  $\text{cm}^{-1}$ , and  $P$  in GPa. Pressure coefficients in italics mark the assignment of this value from another close mode. The DFT-calculated  $\omega_0$  has a related uncertainty of  $\pm 5\%$ .

| Mode       | Experimental |                             | DFT        |                             |
|------------|--------------|-----------------------------|------------|-----------------------------|
|            | $\omega_0$   | $\partial\omega/\partial P$ | $\omega_0$ | $\partial\omega/\partial P$ |
| $B_{3g}^1$ | 33(2)        | 3.0(3)                      | 36         | 3.3(1)                      |
| $B_{1g}^1$ | 38(2)        | 1.8(3)                      | 37         | 3.6(1)                      |
| $A_g^1$    | 44(2)        | 1.3(1)                      | 42         | 1.4(1)                      |
| $A_g^2$    | 49(3)        | 2.7(1)                      | 45         | 4.1(1)                      |
| $B_{2g}^1$ | 47(3)        | 1.8(1)                      | 58         | 1.9(1)                      |
| $B_{2g}^2$ | 59(4)        | 3.1(4)                      | 65         | 6.7(2)                      |
| $A_g^3$    | 78(2)        | 15.2(3)                     | 75         | 10.6(1)                     |
| $B_{1g}^2$ | 94(4)        | -                           | 94         | 6.4(1)                      |
| $A_g^4$    | 103(2)       | 10.5(5)                     | 98         | 8.6(2)                      |
| $B_{3g}^2$ | 113(3)       | 5.0(1)                      | 100        | 5.5(1)                      |
| $B_{2g}^3$ | 108(4)       | 3.3(1)                      | 108        | 2.7(1)                      |
| $B_{2g}^4$ | 129(3)       | 4.1(2)                      | 119        | 5.6(1)                      |
| $A_g^5$    | 142(4)       | 7.6(2)                      | 131        | 6.0(1)                      |
| $B_{2g}^5$ | 146(3)       | 3.3(1)                      | 132        | 4.0(1)                      |
| $B_{3g}^3$ | 173(3)       | 2.7(1)                      | 163        | 2.3(1)                      |
| $B_{1g}^3$ | 177(2)       | 2.8(1)                      | 166        | 2.7(1)                      |
| $B_{2g}^6$ | 183(4)       | 3.1(2)                      | 176        | 5.3(1)                      |
| $A_g^6$    | 186(3)       | 3.5(1)                      | 183        | 5.0(1)                      |
| $A_g^7$    | 222(2)       | 3.5(1)                      | 212        | 3.9(1)                      |
| $B_{2g}^7$ | 232(4)       | -                           | 229        | 3.5(1)                      |
| $B_{1g}^4$ | 248(2)       | 1.2(6)                      | 232        | 3.7(2)                      |
| $B_{3g}^4$ | 260(3)       | 0.8(4)                      | 242        | 0.6(2)                      |
| $B_{3g}^5$ | 253(4)       | 2.7(2)                      | 249        | 2.4(1)                      |
| $A_g^8$    | 270(2)       | 2.5(1)                      | 258        | 6.7(1)                      |
| $B_{1g}^5$ | 253(4)       | 2.7(2)                      | 258        | 2.3(1)                      |
| $B_{2g}^8$ | 238(3)       | -                           | 261        | 5.0(1)                      |
| $B_{1g}^6$ | 280(3)       | 3.5(4)                      | 270        | 3.2(1)                      |
| $B_{3g}^6$ | 287(3)       | 3.6(1)                      | 273        | 3.5(1)                      |
| $B_{3g}^7$ | 298(3)       | 6.1(1)                      | 277        | 4.7(1)                      |
| $B_{1g}^7$ | 300(4)       | 6.7(2)                      | 279        | 4.7(1)                      |
| $A_g^9$    | 323(2)       | 2.8(2)                      | 300        | 4.9(1)                      |
| $B_{2g}^9$ | 334(4)       | 2.3(7)                      | 307        | 7.8(3)                      |
| $A_g^{10}$ | 340(2)       | 1.6(2)                      | 320        | 1.5(2)                      |

|               |        |         |      |         |
|---------------|--------|---------|------|---------|
| $B_{2g}^{10}$ | 351(3) | 1.9(5)  | 322  | 1.6(1)  |
| $B_{2g}^{11}$ | 370(3) | 7.6(2)  | 372  | 3.8(1)  |
| $A_g^{11}$    | 397(2) | 3.0(3)  | 382  | 3.0(1)  |
| $A_g^{12}$    | 435(4) | 5.5(3)  | 430  | 3.4(1)  |
| $B_{2g}^{12}$ | 440(3) | 4.2(5)  | 431  | 3.5(1)  |
| $B_{1g}^8$    | 485(2) | 10.0(1) | 456  | 10.7(1) |
| $B_{3g}^8$    | 485(2) | 10.0(1) | 457  | 10.6(1) |
| $A_g^{13}$    | 447(2) | 2.1(1)  | 476  | 1.3(1)  |
| $B_{2g}^{13}$ | 452(3) | 1.9(3)  | 477  | 1.2(1)  |
| $A_g^{14}$    | 483(5) | 1.3(5)  | 511  | 1.3(1)  |
| $B_{2g}^{14}$ | 523(3) | 1.5(6)  | 526  | 1.3(1)  |
| $B_{3g}^9$    | 678(2) | 8.0(1)  | 668  | 5.7(1)  |
| $B_{1g}^9$    | 678(2) | 8.0(1)  | 668  | 5.7(1)  |
| $A_g^{15}$    | 758(3) | 8.3(1)  | 777  | 5.6(1)  |
| $B_{2g}^{15}$ | 797(2) | 3.2(3)  | 780  | 5.9(1)  |
| $A_g^{16}$    | 817(3) | 3.2(5)  | 816  | 2.9(1)  |
| $B_{2g}^{16}$ | 855(2) | 5.2(1)  | 873  | 2.4(1)  |
| $A_g^{17}$    | 877(3) | 3.0(3)  | 906  | 1.0(1)  |
| $B_{2g}^{17}$ | 890(2) | 1.5(1)  | 917  | 0.9(2)  |
| $A_g^{18}$    | 956(2) | 0.6(4)  | 984  | 0.6(4)  |
| $B_{2g}^{18}$ | 992(2) | 1.5(2)  | 1030 | -0.2(1) |

Table S2. Infrared modes, wavenumbers and pressure coefficients corresponding to the DFT calculated active IR modes at ambient conditions for  $\text{PbV}_2\text{O}_6$ .  $\omega_0$  is expressed in  $\text{cm}^{-1}$  (uncertainty of  $\pm 5\%$ ) and  $P$  in GPa.

| Mode       | $\omega_0$ | $\partial\omega/\partial P$ | Mode          | $\omega_0$ | $\partial\omega/\partial P$ |
|------------|------------|-----------------------------|---------------|------------|-----------------------------|
| $B_{1u}^2$ | 49         | 2.6(1)                      | $B_{3u}^9$    | 292        | 2.2(4)                      |
| $B_{3u}^2$ | 50         | 6.9(1)                      | $B_{3u}^{10}$ | 339        | 2.1(1)                      |
| $B_{2u}^2$ | 51         | 5.0(1)                      | $B_{1u}^{10}$ | 350        | 4.0(1)                      |
| $B_{1u}^3$ | 63         | 10.4(1)                     | $B_{1u}^{11}$ | 367        | 2.9(1)                      |
| $B_{3u}^3$ | 73         | 1.7(1)                      | $B_{3u}^{11}$ | 376        | 4.4(1)                      |
| $B_{1u}^4$ | 79         | 3.6(1)                      | $B_{1u}^{12}$ | 414        | 2.2(1)                      |
| $B_{3u}^4$ | 93         | 2.3(1)                      | $B_{3u}^{12}$ | 421        | 1.9(1)                      |
| $B_{3u}^5$ | 118        | 10.3(1)                     | $B_{2u}^8$    | 450        | 7.1(1)                      |
| $B_{1u}^5$ | 140        | 4.6(1)                      | $B_{3u}^{13}$ | 485        | 1.9(1)                      |
| $B_{1u}^6$ | 152        | 6.7(1)                      | $B_{1u}^{13}$ | 486        | 1.8(1)                      |
| $B_{2u}^3$ | 167        | 2.4(1)                      | $B_{3u}^{14}$ | 515        | 1.0(2)                      |
| $B_{3u}^6$ | 210        | 4.6(1)                      | $B_{1u}^{14}$ | 525        | 0.8(3)                      |
| $B_{2u}^4$ | 219        | 1.8(1)                      | $B_{2u}^9$    | 661        | 3.9(1)                      |
| $B_{3u}^7$ | 220        | 1.9(1)                      | $B_{1u}^{15}$ | 754        | 4.7(1)                      |
| $B_{1u}^7$ | 228        | 1.5(1)                      | $B_{3u}^{15}$ | 766        | 2.7(1)                      |
| $B_{2u}^5$ | 238        | 0.9(2)                      | $B_{3u}^{16}$ | 833        | 2.8(1)                      |
| $B_{1u}^8$ | 260        | 2.4(1)                      | $B_{1u}^{16}$ | 869        | 1.7(1)                      |
| $B_{3u}^8$ | 262        | 2.2(3)                      | $B_{3u}^{17}$ | 886        | 1.0(1)                      |
| $B_{2u}^6$ | 263        | 2.5(1)                      | $B_{1u}^{17}$ | 902        | 0.9(1)                      |
| $B_{2u}^7$ | 278        | 3.2(1)                      | $B_{1u}^{18}$ | 984        | 1.2(1)                      |
| $B_{1u}^9$ | 290        | 1.4(1)                      | $B_{3u}^{18}$ | 1000       | 0.7(1)                      |

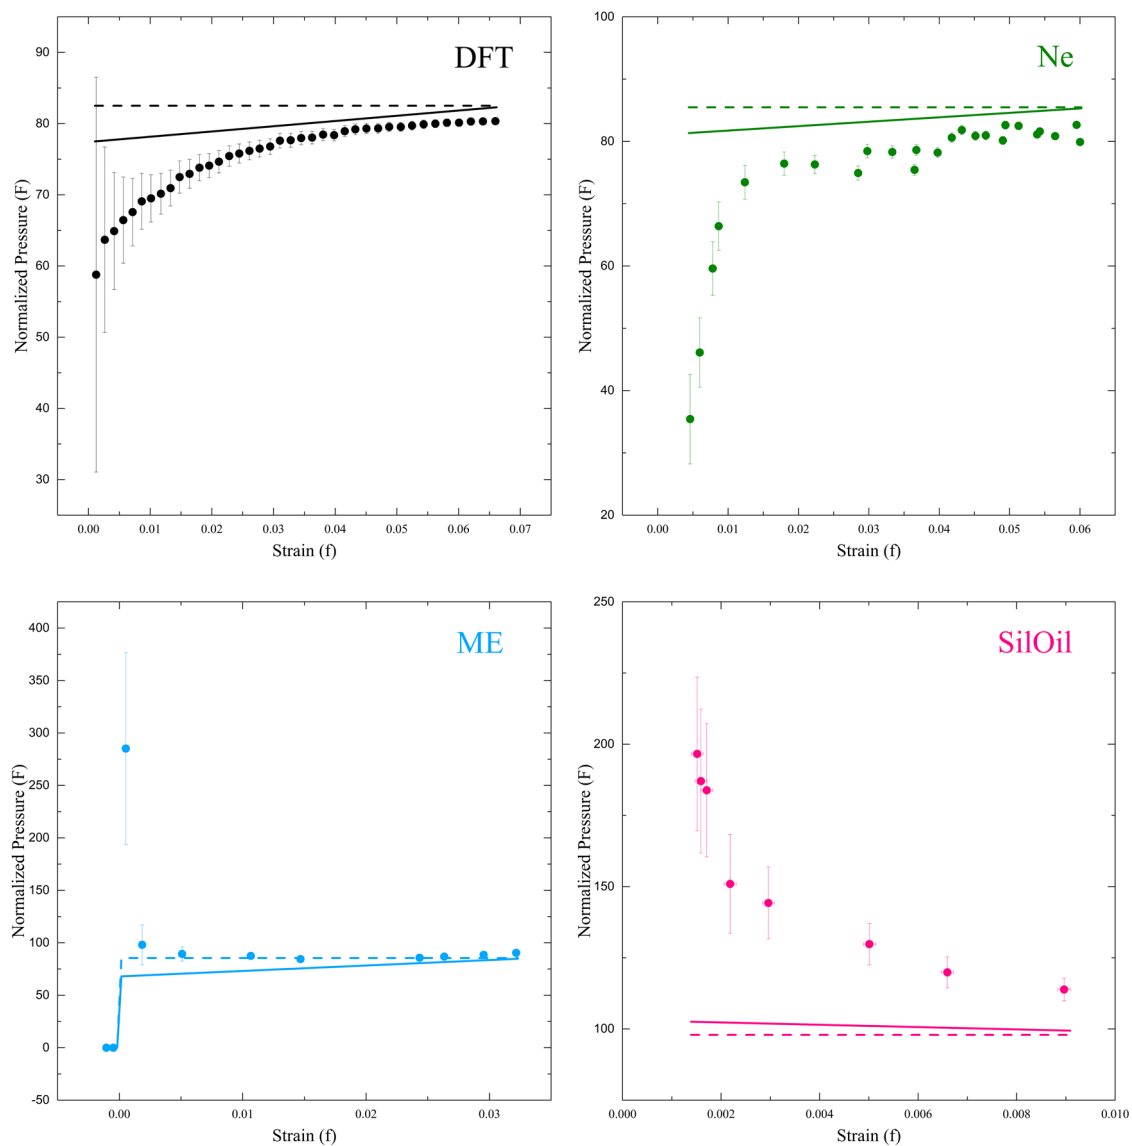

Figure S1. Normalized pressure (F) vs the Euler strain (f) for all data (dots) used to fit the EOS in Table 1. The Birch-Murnaghan fits are represented with solid lines for 3<sup>rd</sup> order and dashed lines for 2<sup>nd</sup> order.

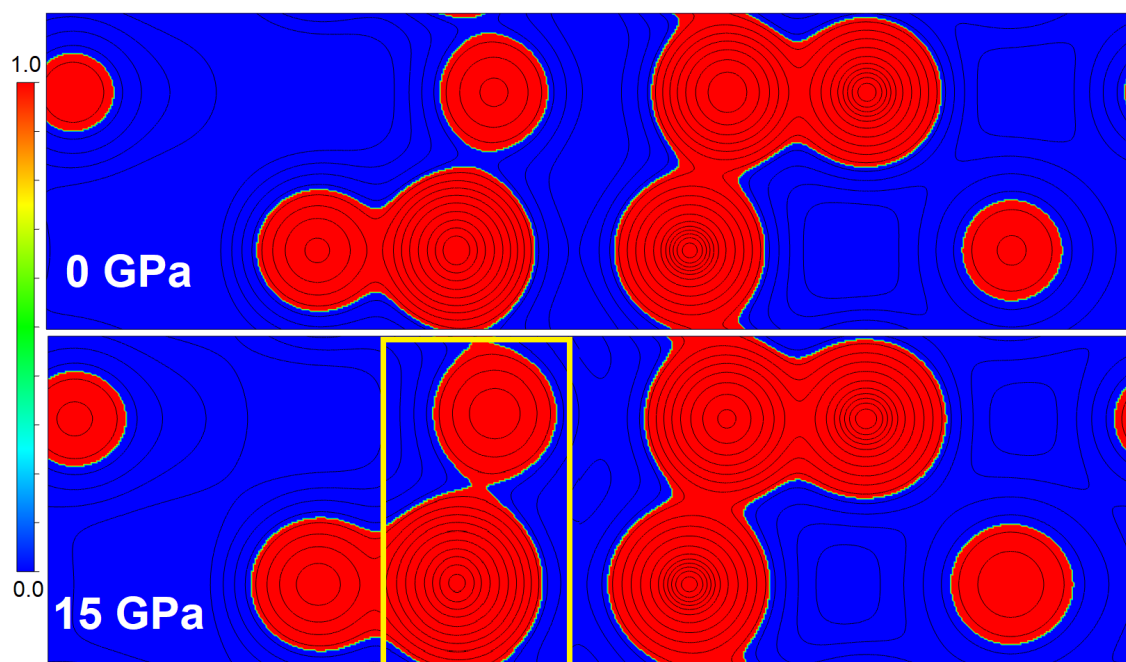

Figure S2. Contour plot of the calculated electron-localization function of  $\text{PbV}_2\text{O}_6$  at 0 and 15 GPa. The region highlighted with a yellow framework shows the formation of an additional V-O bond.
